# Supplementary material for: Seed type, habitat and time of day influence post-dispersal seed removal in temperate ecosystems
Source: PeerJ journal article supplement (doi:10.7717/peerj.8769), 2020-03-13
Supplement: Supplement01.pdf [file Supplement01.pdf]

Appendix 1. GPS coordinates of forest and grassland sites in Darmstadt, Airlenbach and Zell in South Hesse, Germany. LoCo = *Lotus corniculatus* , ChMa = *Chelidonium majus* , hHeAn = hulled *Helianthus annuus* , uHeAn = unhulled *Helianthus annuus* .

| plot_ID                                          | north     | east     | habitat   | region     | seed type             | daytime   |
|--------------------------------------------------|-----------|----------|-----------|------------|-----------------------|-----------|
| <i>Post-dispersal seed removal and seed type</i> |           |          |           |            |                       |           |
| 1                                                | 49.857550 | 8.678983 | forest    | Darmstadt  | all seed types        | day       |
| 2                                                | 49.857750 | 8.677800 | grassland | Darmstadt  | all seed types        | day       |
| 3                                                | 49.856717 | 8.687950 | forest    | Darmstadt  | all seed types        | day       |
| 4                                                | 49.859467 | 8.686967 | grassland | Darmstadt  | all seed types        | day       |
| 5                                                | 49.589933 | 8.926767 | forest    | Airlenbach | all seed types        | day       |
| 6                                                | 49.589450 | 8.925950 | grassland | Airlenbach | all seed types        | day       |
| <i>Post-dispersal seed removal and daytime</i>   |           |          |           |            |                       |           |
| 41                                               | 49.86560  | 8.67948  | forest    | Darmstadt  | LoCo/ChMa/hHeAn/uHeAn | day/night |
| 42                                               | 49.86753  | 8.68029  | grassland | Darmstadt  | LoCo/ChMa/hHeAn/uHeAn | day/night |
| 43                                               | 49.86686  | 8.68013  | forest    | Darmstadt  | LoCo/ChMa/hHeAn/uHeAn | day/night |
| 44                                               | 49.86103  | 8.68619  | grassland | Darmstadt  | LoCo/ChMa/hHeAn/uHeAn | day/night |
| 45                                               | 49.86121  | 8.68788  | forest    | Darmstadt  | LoCo/ChMa/hHeAn/uHeAn | day/night |
| 46                                               | 49.85990  | 8.68636  | grassland | Darmstadt  | LoCo/ChMa/hHeAn/uHeAn | day/night |
| 47                                               | 49.85693  | 8.68744  | forest    | Darmstadt  | LoCo/ChMa/hHeAn/uHeAn | day/night |
| 48                                               | 49.85720  | 8.68580  | forest    | Darmstadt  | LoCo/ChMa/hHeAn/uHeAn | day/night |
| 49                                               | 49.85783  | 8.67902  | forest    | Darmstadt  | LoCo/ChMa/hHeAn/uHeAn | day/night |
| 50                                               | 49.85846  | 8.67818  | grassland | Darmstadt  | LoCo/ChMa/hHeAn/uHeAn | day/night |
| 51                                               | 49.85885  | 8.67884  | grassland | Darmstadt  | LoCo/ChMa/hHeAn/uHeAn | day/night |
| 52                                               | 49.86560  | 8.67936  | grassland | Darmstadt  | LoCo/ChMa/hHeAn/uHeAn | day/night |
| 53                                               | 49.59454  | 8.92322  | grassland | Airlenbach | LoCo/ChMa/hHeAn/uHeAn | day/night |
| 54                                               | 49.60108  | 8.92363  | forest    | Airlenbach | LoCo/ChMa/hHeAn/uHeAn | day/night |
| 55                                               | 49.60038  | 8.92011  | grassland | Airlenbach | LoCo/ChMa/hHeAn/uHeAn | day/night |
| 56                                               | 49.60119  | 8.91945  | grassland | Airlenbach | LoCo/ChMa/hHeAn/uHeAn | day/night |
| 57                                               | 49.60140  | 8.91940  | forest    | Airlenbach | LoCo/ChMa/hHeAn/uHeAn | day/night |
| 58                                               | 49.60119  | 8.91945  | forest    | Airlenbach | LoCo/ChMa/hHeAn/uHeAn | day/night |
| 59                                               | 49.59946  | 8.91281  | grassland | Airlenbach | LoCo/ChMa/hHeAn/uHeAn | day/night |
| 60                                               | 49.59882  | 8.90799  | forest    | Airlenbach | LoCo/ChMa/hHeAn/uHeAn | day/night |
| 61                                               | 49.59827  | 8.90898  | forest    | Airlenbach | LoCo/ChMa/hHeAn/uHeAn | day/night |
| 62                                               | 49.59771  | 8.90854  | grassland | Airlenbach | LoCo/ChMa/hHeAn/uHeAn | day/night |
| 63                                               | 49.59770  | 8.91023  | grassland | Airlenbach | LoCo/ChMa/hHeAn/uHeAn | day/night |
| 64                                               | 49.59000  | 8.92646  | forest    | Airlenbach | LoCo/ChMa/hHeAn/uHeAn | day/night |
| 65                                               | 49.71755  | 8.99042  | grassland | Zell       | LoCo/ChMa/hHeAn/uHeAn | day/night |
| 66                                               | 49.71172  | 8.99162  | grassland | Zell       | LoCo/ChMa/hHeAn/uHeAn | day/night |
| 67                                               | 49.71300  | 8.99037  | grassland | Zell       | LoCo/ChMa/hHeAn/uHeAn | day/night |
| 68                                               | 49.71230  | 8.99036  | grassland | Zell       | LoCo/ChMa/hHeAn/uHeAn | day/night |
| 69                                               | 49.71342  | 8.99003  | forest    | Zell       | LoCo/ChMa/hHeAn/uHeAn | day/night |
| 70                                               | 49.71118  | 8.98912  | forest    | Zell       | LoCo/ChMa/hHeAn/uHeAn | day/night |
| 71                                               | 49.71032  | 8.98934  | forest    | Zell       | LoCo/ChMa/hHeAn/uHeAn | day/night |
| 72                                               | 49.70643  | 8.99390  | forest    | Zell       | LoCo/ChMa/hHeAn/uHeAn | day/night |
